# Supplementary material for: Frailty, Mental Disorders, and Metabolic Syndrome: A Genetic Association and Mediation Mendelian Randomization Study
Source: medRxiv preprint, doi:10.1101/2024.01.16.24301316, version 1 (2024-01-17)
Supplement: Supplementary Fig S1 [file 301316_file06.docx]

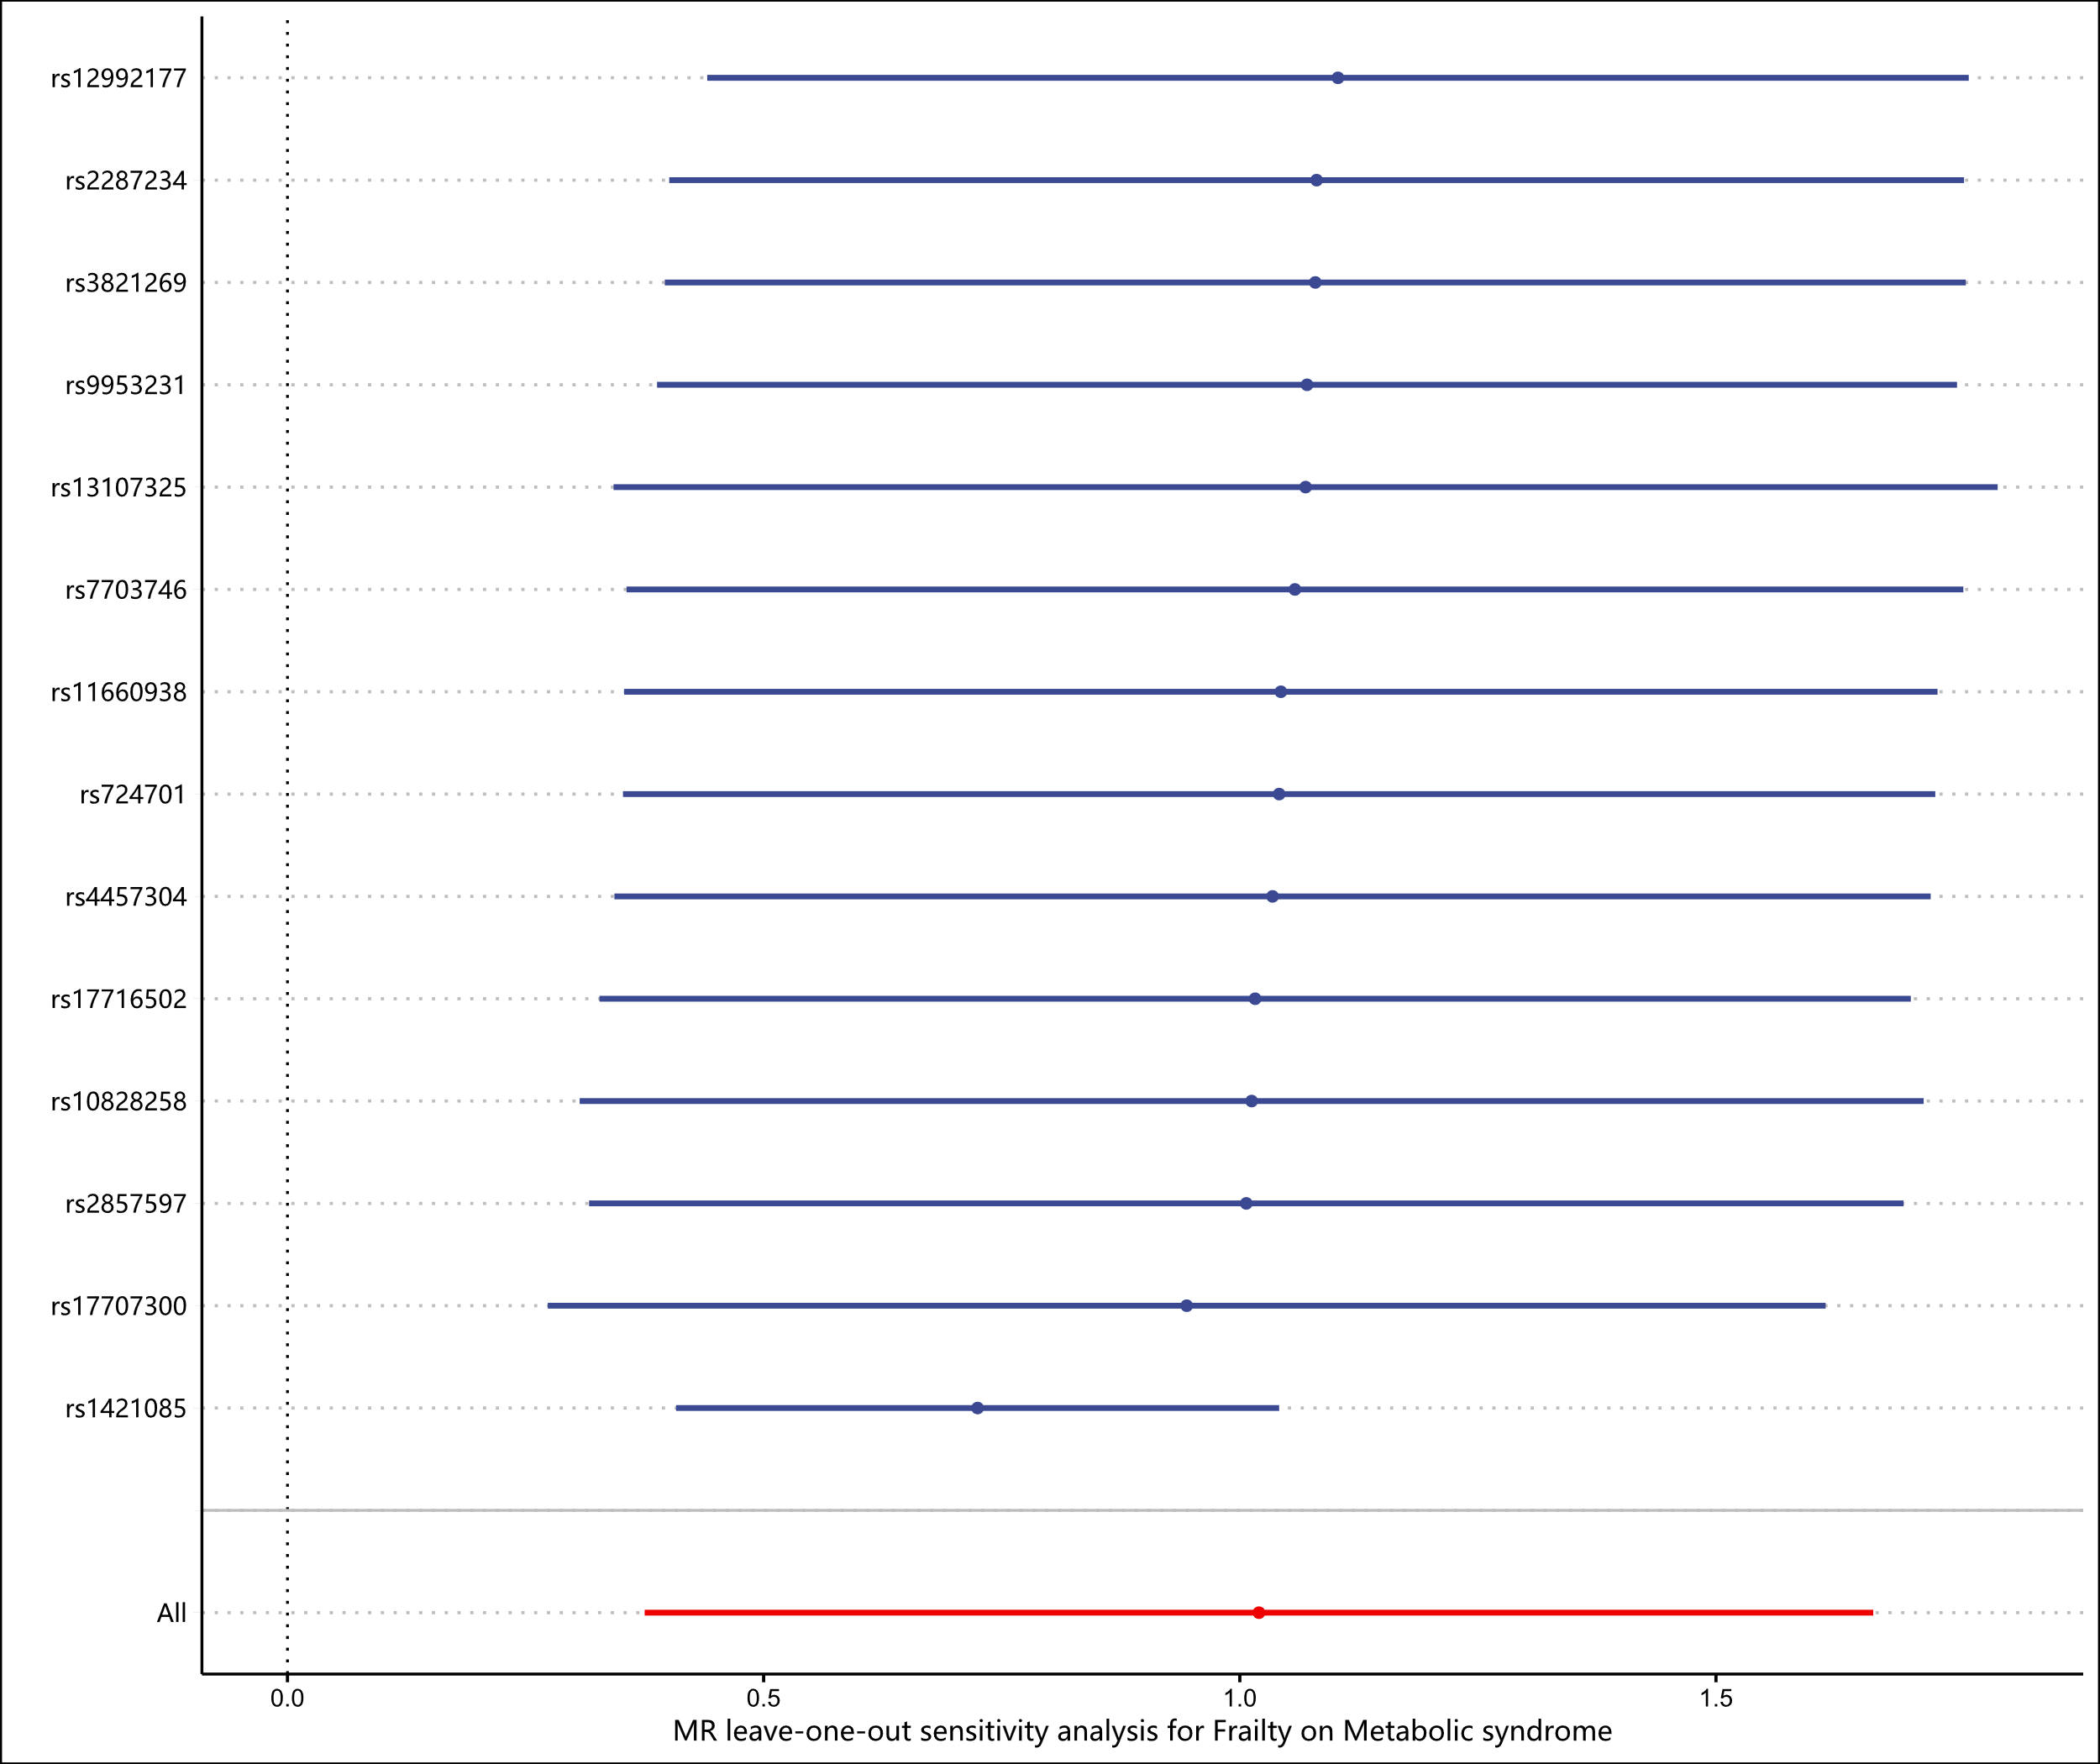


Supplementary Fig S1. Leave-one-out analysis for the causal effect of frailty on metabolic syndrome.
